# Supplementary material for: Genetically induced microtubule disruption in the mouse intestine impairs intracellular organization and transport
Source: PubMed Central journal article supplement — Mol Biol Cell. 2018 Jul 1;29(13):1533–41. doi: 10.1091/mbc.E18-01-0057 (PMC6080650; doi:10.1091/mbc.e18-01-0057), 2018-07-01
Supplement: mbc-29-1533-s001.pdf [file mbc-29-1533-s001.pdf]

# Supplemental Materials

*Molecular Biology of the Cell*

Muroyama et al.

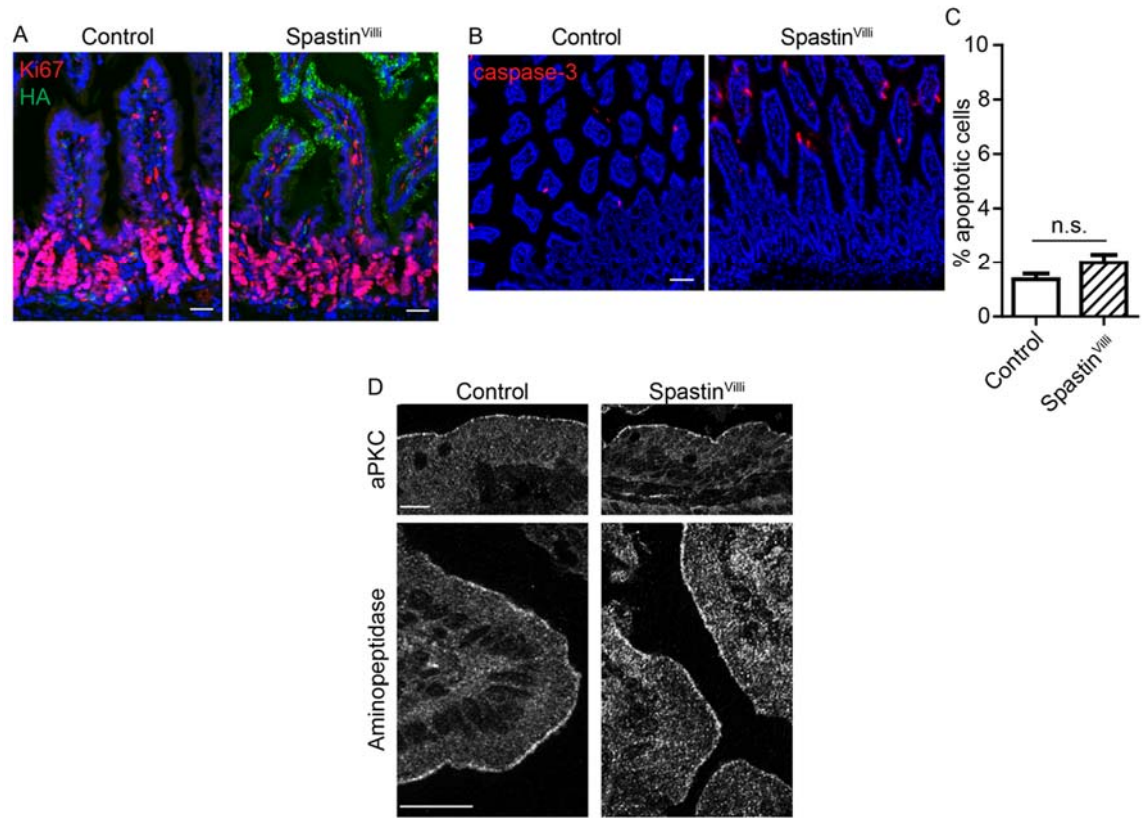

**Supplemental Figure 1. Additional characterization of Spastin<sup>Villi</sup> mice.**

A. Ki67+ cells remain restricted to crypts of Spastin<sup>Villi</sup> mice. Scale-25µm.

B. Cleaved-caspase-3 staining in control and Spastin<sup>Villi</sup> mice. Scale-50µm.

C. Quantification of caspase-3-positive cells in control and Spastin<sup>Villi</sup> mice. n=3 mice for each genotype. n.s.-not significant.

D. Localization of aPKC and aminopeptidase in control and Spastin<sup>Villi</sup> mice. Scale-20µm.

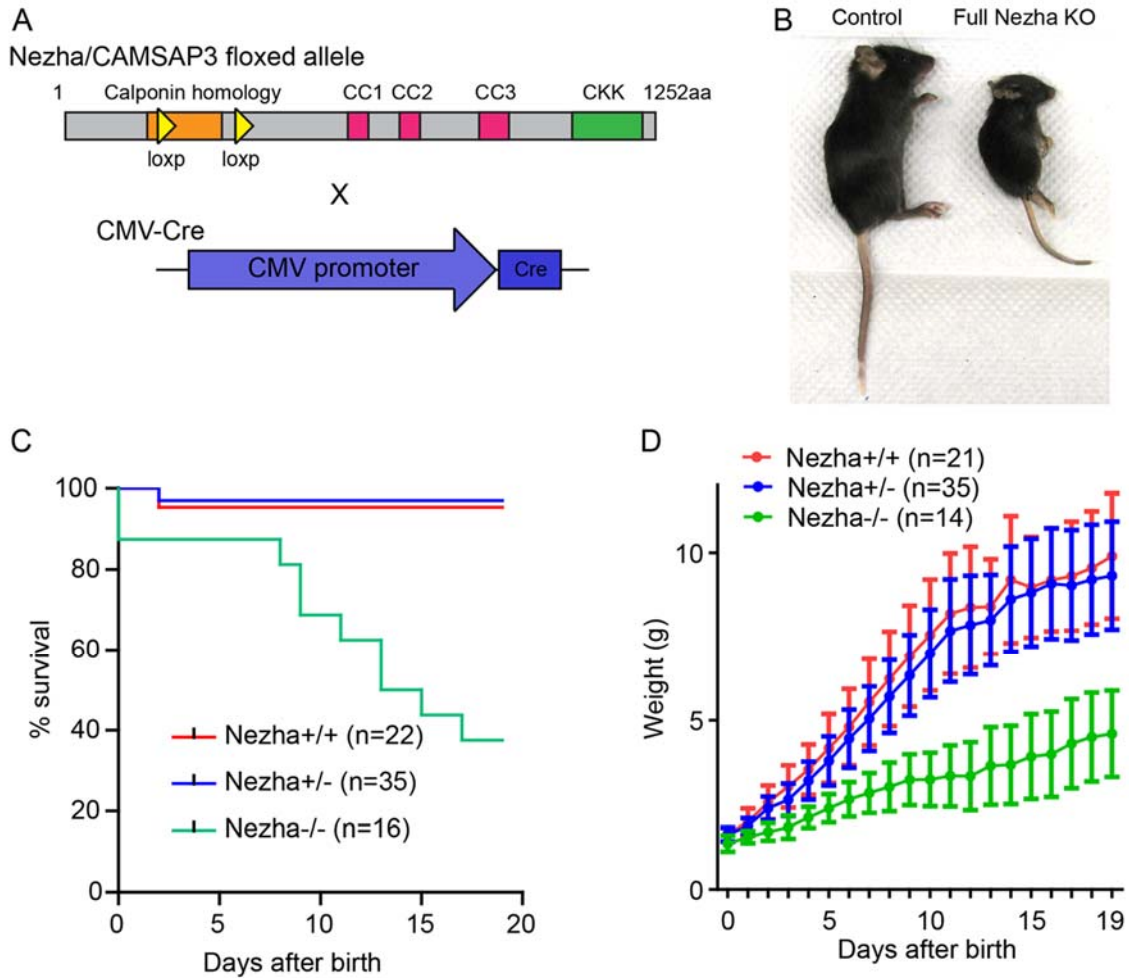

**Supplemental Figure 2. Growth phenotype of full Nezha knockout mouse.**

A. Alleles used to generate full Nezha/CAMSAP3 deletion mice.

B. Pictures of P20 control and full Nezha KO mice.

C. Kaplan-Meier plot of Nezha+/+, Nezha+/-, and Nezha-/- mice.

D. Growth curves of Nezha+/+, Nezha+/-, and Nezha-/- mice until weaning. Error bars show S.D.

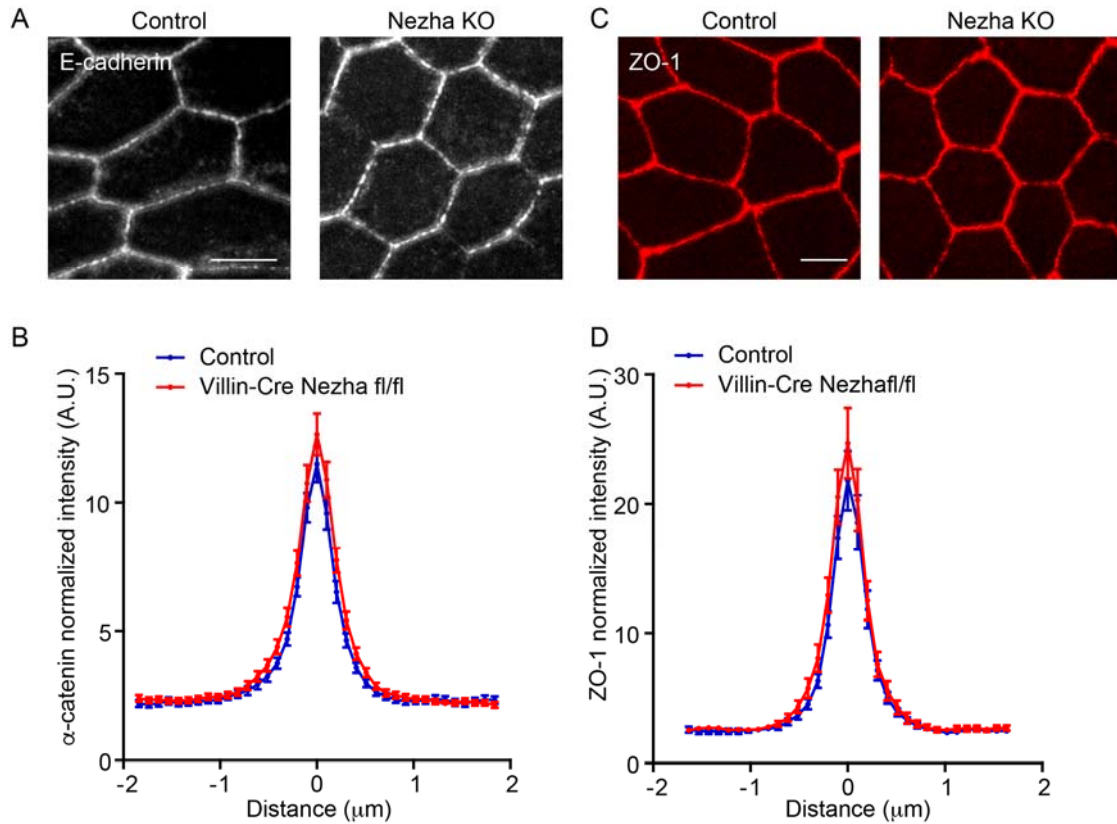

**Supplemental Figure 3. Adherens and tight junctions are unaffected by Nezha deletion *in vivo*.**

A. E-cadherin localization in control and Nezha KO mice.

B. Lines scans of junctional  $\alpha$ -catenin fluorescence intensity in control and Nezha KO mice. n=70 line scans from at least three mice per genotype.

C. ZO-1 localization in control and Nezha KO mice.

D. Line scans of ZO-1 fluorescence intensity across tight junctions in control and Nezha KO mice. n=70 line scans from at least three mice per genotype.

All scale bars are 5 $\mu$ m.
